# Supplementary material for: Geomorphology of icy debris fans: Delivery of ice and sediment to valley glaciers decoupled from icecaps
Source: Oxford University Press journal article supplement (doi:10.1130/ges01622.1), 2018-06-04
Supplement: ges01622_suppitemb.zip [file ges01622_suppitemb.zip]

| Event Log -- Douglas Neve-Glacier New Zealand -- January 2013 |          |      |                  |
|---------------------------------------------------------------|----------|------|------------------|
| January 6, 2013                                               |          |      |                  |
| Time                                                          | Location | Size | Notes            |
| 0800                                                          | 1        | A    | Apex             |
| 0807                                                          | 2        | A    | Apex             |
| 0820                                                          | 3        | B    |                  |
| 0825                                                          | 1        | A    | Upper midfan     |
| 0830                                                          | 5-6      | AA   | Across fan – vid |
| 0841                                                          | 3        | A    | On fan           |
| 0850                                                          | 0        | B    |                  |
| 0854                                                          | 0        | C    |                  |
| 0855                                                          | 2        | C    |                  |
| 0857                                                          | 2        | C    |                  |
| 0912                                                          | 2-3      | B    |                  |
| 0922                                                          | 6        | B    |                  |
| 0924                                                          | 4        | C    | Above            |
| 0926                                                          | 3        | C    | Above            |
| 0929                                                          | 4        | C    | Above            |
| 0935                                                          | 5-6      | C    | Above            |
| 0940                                                          | 4        | B    |                  |
| 0946                                                          | 3        | B    |                  |
| 0954                                                          | 2        | B    |                  |
| 0957                                                          | 4        | B    |                  |
| 1024                                                          | 2        | C    |                  |
| 1035                                                          | 3        | A    |                  |
| 1041                                                          | 4        | B    |                  |
| 1042                                                          | 5        | C    |                  |
| 1045                                                          | 3        | B    |                  |
| 1047                                                          | 0        | B    |                  |
| 1054                                                          | 3        | AA   | Proximal fan     |
| 1055                                                          | 2        | C    |                  |
| 1104                                                          | 4        | C    |                  |
| 1114                                                          | 4        | B    |                  |
| 1138                                                          | 3        | C    |                  |
| 1149                                                          | 4        | C    |                  |
| 1154                                                          | 0        | B    |                  |
| 1155                                                          | 1        | C    |                  |
| 1215                                                          | 4        | C    |                  |
| 1217                                                          | 3        | C    |                  |
| 1219                                                          | 4        | B    | Above niche      |
| 1221                                                          | 3        | B    | Apex             |
| 1223                                                          | 4        | C    |                  |

|      |     |              |                  |
|------|-----|--------------|------------------|
| 1224 | 3   | C            |                  |
| 1227 | 1-2 | A            | Midfan           |
| 1229 | 3   | C            |                  |
| 1234 | 4   | C            |                  |
| 1246 | 3   | B            |                  |
| 1247 | 3   | C            |                  |
| 1248 | 3   | C            |                  |
| 1250 | 3   | B            |                  |
| 1251 | 3   | C            |                  |
| 1259 | 3   | A            | Proximal fan     |
| 1311 | 1   | C            |                  |
| 1312 | 4   | C            |                  |
| 1313 | 3   | A            | Apex             |
| 1322 | 4   | B            |                  |
| 1326 | 2   | B            |                  |
| 1328 | 1-2 | B            |                  |
| 1330 | 3   | B            |                  |
| 1331 | 0   | B            |                  |
| 1333 | 1   | B            |                  |
| 1334 | 0   | C            |                  |
| 1334 | 4   | B            |                  |
| 1338 | 0   | B            |                  |
| 1344 | 3   | AAA          | 3m x 100m x 150m |
| 1348 | 3   | Slush flow A |                  |
| 1358 | 0   | C            |                  |
| 1405 | 1   | B            | Apex             |
| 1410 | 0   | C            |                  |
| 1413 | 0   | C            |                  |
| 1414 | 3   | C            |                  |
| 1416 | 3   | C            |                  |
| 1419 | 3   | C            |                  |
| 1427 | 1   | Slushflow C  |                  |
| 1428 | 3-4 | Slushflow C  |                  |
| 1429 | 3-4 | C            |                  |
| 1450 | 0   | C            |                  |
| 1458 | 1   | B+           |                  |
| 1501 | 3   | C            |                  |
| 1506 | 0   | B            |                  |
| 1507 | 3   | A            | Apex             |
| 1510 | 0   | C            |                  |
| 1514 | 3   | C            |                  |
| 1515 | 1   | C            |                  |

|      |     |    |                   |
|------|-----|----|-------------------|
| 1523 | 1   | C  |                   |
| 1531 | 1   | A  | Midfan flow morph |
| 1539 | 1   | C  |                   |
| 1543 | 1   | B  | Midfan            |
| 1544 | 3   | B  | Proximal fan      |
| 1547 | 0   | B  |                   |
| 1550 | 0   | B  |                   |
| 1552 | 0   | B  |                   |
| 1602 | 0   | B  |                   |
| 1605 | 0   | B  |                   |
| 1609 | 1   | C  |                   |
| 1619 | 3   | B+ |                   |
| 1624 | 0   | C  |                   |
| 1627 | 3   | C  |                   |
| 1632 | 5   | B+ |                   |
| 1635 | 3   | A  | Midfan            |
| 1636 | 5   | C  |                   |
| 1645 | 4A  | A  | Proximal fan      |
| 1646 | 3   | C  |                   |
| 1647 | 1   | C  |                   |
| 1652 | 3   | C  |                   |
| 1659 | 1   | C  |                   |
| 1703 | 3   | C  |                   |
| 1703 | 3-4 | C  |                   |
| 1703 | 3   | C  |                   |
| 1704 | 1   | C  |                   |
| 1707 | 0   | C  |                   |
| 1708 | 1   | C  |                   |
| 1713 | 4-5 | B+ |                   |
| 1721 | 0   | C  |                   |
| 1722 | 3   | B  |                   |
| 1727 | 3-4 | C  |                   |
| 1728 | 0   | C  |                   |
| 1730 | 0   | C  |                   |
| 1743 | 4   | B+ |                   |
| 1754 | 0   | C  |                   |
| 1755 | 4   | A  | Proximal fan      |
| 1757 | 3   | B  |                   |
| 1808 | 3   | B  |                   |
| 1811 | 0   | C  |                   |
| 1821 | 3-4 | B  |                   |
| 1828 | 0   | B  |                   |

[illegible]

| Event Log – Douglas Neve-Glacier – January 14, 2013 |          |            |             |
|-----------------------------------------------------|----------|------------|-------------|
| Time                                                | Location | Size       | Notes       |
| 0909                                                | 2        | B          |             |
| 0912                                                | 4        | B          |             |
| 0920                                                | 3        | C          |             |
| 1005                                                | 2        | C          |             |
| 1015                                                | 4-5      | C          | Upper shelf |
| 1016                                                | 4-5      | C          | Upper shelf |
| 1020                                                | 2        | C          |             |
| 1032                                                | 4        | C          |             |
| 1045                                                | 2        | C          |             |
| 1050                                                | 0        | B          |             |
| 1056                                                | 3        | C          |             |
| 1102                                                | 0        | B          |             |
| 1103                                                | 1        | C          |             |
| 1115                                                | 2        | B          |             |
| 1120                                                | 3        | B          |             |
| 1121                                                | 3        | B          |             |
| 1132                                                | 1        | C          |             |
| 1140                                                | 1        | C          |             |
| 1142                                                | 3        | C          |             |
| 1144                                                | 1        | C          |             |
| 1150                                                | 1        | C          |             |
| 1151                                                | 3        | C          |             |
| 1156                                                | 3        | C          |             |
| 1157                                                | 0        | C          |             |
| 1158                                                | 0        | C          |             |
| 1200                                                | 0        | C          |             |
| 1202                                                | 1        | C          |             |
| 1204                                                | 1        | B          |             |
| 1208                                                | 1        | B+         |             |
| 1214                                                | 3-4      | B+         | High shelf  |
| 1219                                                | 1        | C          |             |
| 1221                                                | 1        | C          |             |
| 1223                                                | 1        | C+         |             |
| 1225                                                | 1        | C          |             |
| 1227                                                | 1        | C+         |             |
| 1230                                                | 0        | C          |             |
| 1232                                                | 0        | C          |             |
| 1244                                                | 1        | C          |             |
| 1250                                                | 4-5      | High shelf |             |
| 1305                                                | 4-5      | High shelf |             |

|                    |              |                             |              |
|--------------------|--------------|-----------------------------|--------------|
| 1308               | 3            | C                           |              |
| 1330               | 3            | C                           |              |
| 1345               | 1            | C                           |              |
| 1348               | 1            | C                           |              |
| 1350               | 1            | C                           |              |
| 1355               | 2            | B                           |              |
| 1400               | 3            | B                           |              |
| 1405               | 1            | C                           |              |
| 1410               | 4-5          | High shelf                  |              |
| 1415               | 0            | C                           |              |
| 1440               | 0            | B                           |              |
| 1445               | 0            | C                           |              |
| 1450               | 1            | AA                          | Proximal fan |
|                    |              |                             |              |
|                    |              |                             |              |
| 52 events          | 5 hours      | Generally smaller events    |              |
| All ice avalanches | 10 events/hr | Overcast and cool           |              |
|                    |              | ! week after mega rain/snow |              |

Note: Location 0 indicated avalanches from Mt Sefton – not included on IDFs

| Event Log – Douglas Glacier, New Zealand – March 2014 |                   |            |            |                        |
|-------------------------------------------------------|-------------------|------------|------------|------------------------|
| Time                                                  | Location          | Event Type | Event Size | Notes                  |
| <b>MARCH 11, 2014</b>                                 |                   |            |            |                        |
|                                                       |                   |            |            |                        |
| 1707                                                  | Fan 1             | AV         | C          |                        |
| 1709                                                  | Fan 2             | AV         | C          |                        |
| 1712                                                  | Fan 2             | AV         | C          |                        |
| 1714                                                  | Fan 2             | AV         | C          |                        |
| 1721                                                  | Fan 7 - catchment | AV         | C          |                        |
| 1727                                                  | Fan 2             | AV         | C          |                        |
| 1731                                                  | Fan 2             | AV         | A          |                        |
| 1740                                                  | Fan 1             | AV         | C          |                        |
| 1742                                                  | Fan 2             | AV         | C          |                        |
| 1744                                                  | Fan 2             | AV         | C          |                        |
| 1746                                                  | Fan 2             | AV         | C          |                        |
| 1749                                                  | Fan 2             | AV         | C          |                        |
| 1750                                                  | Fan 1             | AV         | C          |                        |
| 1754                                                  | Fan 2             | AV         | C          |                        |
| 1757                                                  | Fan 1             | AV         | B          |                        |
| 1759                                                  | Fan 2             | AV         | C          |                        |
|                                                       |                   |            |            |                        |
| <b>MARCH 14, 2014</b>                                 |                   |            |            |                        |
|                                                       |                   |            |            | Mod rainfall on Mar 13 |
| 0748                                                  | Fan 2             | AV         | C          |                        |
| 0752                                                  | Fan 1             | AV         | C          |                        |
| 0757                                                  | Fan 1             | AV         | B          |                        |
| 0803                                                  | Fan 7 - catchmt   | AV         | B          |                        |
| 0813                                                  | Fan 7 - catchmt   | AV         | C          |                        |
| 0820                                                  | Fan 2             | AV         | C          |                        |
| 0821                                                  | Fan 7 - catchmt   | AV         | C          |                        |
| 0829                                                  | Fan 7 - catchmt   | AV         | C          |                        |
| 0837                                                  | Fan 1 - catchment | AV         | C          |                        |
| 0839                                                  | Fan 7 - catchmt   | AV         | C          |                        |
| 0844                                                  | Fan 1 - catchmt   | AV         | C          |                        |
| 0846                                                  | Fan 7 - catchmt   | AV         | C          |                        |
| 0851                                                  | Fan 4             | AV         | B          | apex                   |
| 0857                                                  | Fan 2             | AV         | C          |                        |
| 0859                                                  | Fan 2 - catchmt   | AV         | C          |                        |
| 0901                                                  | Fan 7 - catchmt   | AV         | C          |                        |
| 0915                                                  | Fan 3 - catchmt   | AV         | C          |                        |
| 0917                                                  | Fan 7 - catchmt   | AV         | C          |                        |
| 0920                                                  | Fan 7 - catchmt   | AV         | C          |                        |

|      |                  |    |   |                           |
|------|------------------|----|---|---------------------------|
| 0937 | Fan 6 - catchmt  | AV | B |                           |
| 0938 | Fan 2 - catchmt  | AV | C |                           |
| 0943 | Fan 7 - catchmt  | AV | C |                           |
| 0950 | Fan 3            | AV | B | apex                      |
| 0958 | Fan 2 – catchmt  | AV | C |                           |
| 1002 | Fan 7            | AV | B | apex                      |
| 1005 | Fan 7            | AV | C |                           |
| 1007 | Fan 7            | AV | C |                           |
| 1010 | Fan 7            | AV | C |                           |
| 1020 | Fan 4            | AV | C |                           |
| 1021 | Fan 3            | AV | C |                           |
| 1023 | Fan 3            | AV | A | Upper fan                 |
| 1030 | Fan 6            | AV | C |                           |
| 1031 | Fan 7 - catchmt  | AV | C |                           |
| 1033 | Fan 3 - catchmt  | AV | C |                           |
| 1039 | Fan 7 - catchmt  | AV | C |                           |
| 1041 | Fan 7 - catchmt  | AV | C |                           |
| 1051 | Fan 7 - catchmt  | AV | C |                           |
| 1055 | Sefton - catchmt | AV | C | Formerly called Zero area |
| 1056 | Fan 7 - catchmt  | AV | C |                           |
| 1115 | Sefton - catchmt | AV | C |                           |
| 1124 | Fan 7 - catchmt  | AV | C |                           |
| 1125 | Fan 3 - catchmt  | AV | C |                           |
| 1126 | Fan 3 - catchmt  | AV | C |                           |
| 1145 | Sefton-catchmt   | AV | C |                           |
| 1153 | Fan 7 - catchmt  | AV | C |                           |
| 1155 | Fan 3-4          | AV | C |                           |
| 1156 | Fan 4            | AV | B | apex                      |
| 1158 | Fan 4            | AV | C |                           |
| 1159 | Fan 3 – catchmt  | AV | C |                           |
| 1201 | Fan 7 - catchmt  | AV | C |                           |
| 1203 | Fan 2 - catchmt  | AV | C |                           |
| 1204 | Fan 4 - catchmt  | AV | C |                           |
| 1205 | Sefton - catchmt | AV | C |                           |
| 1207 | Fan 3-4          | AV | C |                           |
| 1213 | Fan 2 - catchmt  | AV | C |                           |
| 1214 | Fan 1 - catchmt  | AV | C |                           |
| 1216 | Fan 2 - catchmt  | AV | C |                           |
| 1217 | Fan 2 - catchmt  | AV | C |                           |
| 1218 | Fan 4            | AV | C |                           |
| 1225 | Fan 7 - catchmt  | AV | C |                           |
| 1230 | Fan 2 - catchmt  | AV | C |                           |
| 1231 | Fan 4 - catchmt  | AV | C |                           |



|      |                  |    |   |           |
|------|------------------|----|---|-----------|
| 1240 | Sefton           | AV | A | Apex area |
| 1241 | Fan 7 - catchmt  | AV | C |           |
| 1258 | Fan 7 - catchmt  | AV | C |           |
| 1303 | Fan 3 - catchmt  | AV | C |           |
| 1307 | Fan 2 - catchmt  | AV | C |           |
| 1310 | Fan 1            | AV | C |           |
| 1312 | Fan 7            | AV | C | Apex      |
| 1322 | Fan 4 - catchmt  | AV | C |           |
| 1324 | Fan 7            | AV | B | Apex      |
| 1326 | Fan 6 - catchmt  | AV | C |           |
| 1327 | Fan 4 - catchmt  | AV | C |           |
| 1331 | Fan 6 - catchmt  | AV | C |           |
| 1334 | Fan 7 - catchmt  | AV | C |           |
| 1335 | Fan 1 - catchmt  | AV | C |           |
| 1338 | Fan 2 - catchmt  | AV | C |           |
| 1350 | Fan 3            | AV | B |           |
| 1351 | Fan 4            | AV | C |           |
| 1353 | Fan 1            | AV | C |           |
| 1354 | Fan 2            | AV | C |           |
| 1355 | Fan 2            | AV | C |           |
| 1356 | Fan 2            | AV | B |           |
| 1357 | Sefton - catchmt | AV | C |           |
| 1400 | Fan 2            | AV | A | Midfan    |
| 1402 | Fan 2            | AV | C |           |
| 1405 | Fan 2            | AV | C |           |
| 1410 | Fan 6 - catchmt  | AV | C |           |
| 1412 | Fan 4 - catchmt  | AV | C |           |
| 1413 | Fan 7 - catchmt  | AV | C |           |
| 1415 | Fan 7 - catchmt  | AV | B |           |
| 1416 | Fan 7 - catchmt  | AV | C |           |
| 1423 | Sefton - catchmt | AV | C |           |
| 1427 | Fan 7 - catchmt  | AV | C |           |
| 1432 | Fan 7 - catchmt  | AV | C |           |
| 1433 | Sefton - catchmt | AV | C |           |
| 1442 | Fan 7 - catchmt  | AV | C |           |
| 1443 | Fan 4 - catch    | AV | C |           |
| 1446 | Fan 4            | AV | C |           |
| 1452 | Fan 2            | AV | C |           |
| 1457 | Fan 2 - catchmt  | AV | C |           |
| 1502 | Sefton - catchmt | AV | C |           |
| 1503 | Fan 4 - catchmt  | AV | C |           |
| 1506 | Fan 4            | AV | C |           |
| 1514 | Fan 4            | AV | C |           |

|      |                  |    |   |           |
|------|------------------|----|---|-----------|
| 1517 | Fan 4            | AV | C |           |
| 1519 | Sefton - catchmt | AV | C |           |
| 1520 | Fan 4            | AV | C |           |
| 1521 | Fan 4            | AV | C |           |
| 1537 | Sefton - catchmt | AV | C |           |
| 1538 | Sefton - catchmt | AV | C |           |
| 1539 | Fan 4            | AV | C |           |
| 1540 | Fan 2            | AV | C |           |
| 1542 | Sefton - catchmt | AV | C |           |
| 1544 | Fan 1            | AV | C |           |
| 1548 | Fan 3            | AV | C |           |
| 1549 | Fan 7 - catchmt  | AV | C |           |
| 1554 | Fan 4            | AV | C |           |
| 1558 | Fan 2            | AV | B | Apex      |
| 1600 | Fan 4            | AV | C |           |
| 1602 | Fan 4            | AV | C |           |
| 1604 | Fan 2            | AV | C |           |
| 1607 | Fan 2            | AV | C |           |
| 1609 | Fan 7 - catchmt  | AV | C |           |
| 1620 | Fan 3            | AV | B |           |
| 1621 | Fan 7 - catchmt  | AV | C |           |
| 1625 | Sefton - catchmt | AV | C |           |
| 1633 | Fan 4            | AV | C |           |
| 1643 | Fan 2            | AV | B | apex      |
| 1645 | Fan 7 - catchmt  | AV | C |           |
| 1646 | Fan 1 - catchmt  | AV | C |           |
| 1646 | Fan 7 - catchmt  | AV | C |           |
| 1646 | Fan 3            | AV | C |           |
| 1647 | Fan 3            | AV | C |           |
| 1702 | Fan 1            | AV | C |           |
| 1704 | Sefton - catchmt | AV | C |           |
| 1713 | Fan 4            | AV | C |           |
| 1714 | Fan 4            | AV | C |           |
| 1718 | Fan 4            | AV | C |           |
| 1742 | Fan 4            | AV | A | Upper fan |
| 1744 | Fan 4            | AV | C |           |
| 1745 | Sefton - catchmt | AV | C |           |
| 1746 | Sefton - catchmt | AV | C |           |
| 1747 | Sefton - catchmt | AV | C |           |
| 1748 | Fan 1 - catchmt  | AV | C |           |
| 1750 | Fan 4            | AV | C |           |
| 1758 | Sefton - catchmt | AV | C |           |
| 1810 | Fan 4            | AV | C |           |

[illegible]

|  |  |  |  |  |
|--|--|--|--|--|
|  |  |  |  |  |
|  |  |  |  |  |
|  |  |  |  |  |

### Douglas Glacier, NZ – Event Log (March 8, 2015)

| Time | Fan     | Event Type | Size | Notes         |
|------|---------|------------|------|---------------|
| 0800 | 2       | AVALANCHE  | C    |               |
| 0807 | Sefton* | AV         | C    |               |
| 0812 | 4       | AV         | C    |               |
| 0816 | 4       | AV         | C    |               |
| 0820 | 5       | AV         | C    |               |
| 0821 | 5       | AV         | A    | Prox fan      |
| 0822 | 4       | AV         | B    |               |
| 0823 | 5       | AV         | C    |               |
| 0824 | 4       | AV         | C    |               |
| 0825 | 5       | AV         | C    |               |
| 0827 | 7       | AV         | B    |               |
| 0828 | 7       | AV         | C    |               |
| 0829 | 4       | AV         | C    |               |
| 0830 | 4       | AV         | C    |               |
| 0831 | 5       | AV         | C    |               |
| 0832 | 4       | AV         | C    |               |
| 0838 | 5       | AV         | C    |               |
| 0839 | 4       | AV         | C    |               |
| 0905 | 5       | AV         | C    |               |
| 0911 | 4       | AV         | C    |               |
| 0922 | 3       | AV         | B    | Upper mid fan |
| 0930 | 3       | AV         | B    | Upper fan     |
| 0931 | 3       | AV         | B    | Upper fan     |
| 0948 | 3       | AV         | C    |               |
| 0952 | 5       | AV         | C    |               |
| 0955 | 4       | AV         | C    |               |
| 0958 | 4       | AV         | C    |               |
| 1007 | 4       | AV         | C    |               |
| 1015 | 7+      | AV         | C    |               |
| 1017 | 7       | AV         | C    |               |
| 1022 | 4       | AV         | C    |               |
| 1031 | 5       | AV         | C    |               |
| 1042 | 5       | AV         | C    |               |
| 1043 | 4       | AV         | C    |               |
| 1047 | 7       | AV         | C    |               |
| 1048 | 4       | AV         | C    |               |
| 1053 | 5       | AV         | C    |               |
| 1054 | 4       | AV         | C    |               |
| 1057 | 7       | AV         | C    |               |

|      |        |            |      |         |
|------|--------|------------|------|---------|
| 1101 | 7      | AV         | C    |         |
| 1104 | 4      | AV         | C    |         |
| TIME | FAN    | EVENT TYPE | SIZE | NOTES   |
| 1105 | 7+     | AV         | C+   |         |
| 1107 | 4      | AV         | A    | mid fan |
| 1109 | 3      | AV         | A    | mid fan |
| 1109 | 4      | AV         | C    |         |
| 1110 | 4      | AV         | C    |         |
| 1117 | 4      | AV         | C    |         |
| 1118 | 4      | AV         | C    |         |
| 1119 | 4      | AV         | C    |         |
| 1124 | 4      | AV         | C    |         |
| 1125 | 5      | AV         | B    |         |
| 1125 | 4      | AV         | A    | Apex    |
| 1126 | 4      | AV         | C    |         |
| 1127 | 4      | AV         | C    |         |
| 1127 | 5      | AV         | C    |         |
| 1128 | 5      | AV         | C    |         |
| 1129 | 4      | AV         | C    |         |
| 1129 | Sefton | AV         | C    |         |
| 1130 | Sefton | AV         | B    |         |
| 1131 | 5      | AV         | C    |         |
| 1132 | 4      | AV         | C    |         |
| 1133 | 1      | AV         | C    |         |
| 1134 | 3      | AV         | C    |         |
| 1135 | 3      | AV         | B    |         |
| 1135 | 4      | AV         | C    |         |
| 1135 | 4      | AV         | C    |         |
| 1136 | 3      | AV         | B    | Apex    |
| 1137 | 5      | AV         | C    |         |
| 1142 | 5      | AV         | C    |         |
| 1143 | 4      | AV         | C    |         |
| 1144 | 1      | AV         | B    | Apex    |
| 1144 | 4      | AV         | C    |         |
| 1145 | 5      | AV         | C    |         |
| 1146 | 7+     | AV         | C    |         |
| 1152 | 4      | AV         | C    |         |
| 1153 | 4      | AV         | C    |         |
| 1154 | 5      | AV         | C    |         |
| 1155 | 3      | AV         | C    |         |
| 1159 | 4      | AV         | C    |         |
| 1205 | Sefton | AV         | C    |         |

|      |        |            |      |         |
|------|--------|------------|------|---------|
| 1206 | 4      | AV         | C    |         |
| 1208 | 4      | AV         | C    |         |
| 1209 | 3-4    | AV         | C    |         |
| 1210 | 4      | AV         | C    |         |
| TIME | FAN    | EVENT TYPE | SIZE | NOTES   |
| 1211 | 3      | AV         | C    |         |
| 1220 | 3      | AV         | C    |         |
| 1222 | 6      | AV         | C    |         |
| 1231 | 4      | AV         | C    |         |
| 1232 | 5      | AV         | C    |         |
| 1234 | Sefton | AV         | C    |         |
| 1235 | 4      | AV         | C    |         |
| 1240 | 4      | AV         | C    |         |
| 1242 | 4      | AV         | C    |         |
| 1243 | 4      | AV         | C    |         |
| 1244 | 4      | AV         | C    |         |
| 1256 | 4      | AV         | C    |         |
| 1258 | 5      | AV         | C    |         |
| 1259 | 1      | AV         | C    |         |
| 1310 | 4      | AV         | C    |         |
| 1315 | 4      | AV         | B    |         |
| 1316 | 4      | AV         | A    | mid fan |
| 1318 | 4      | AV         | C    |         |
| 1321 | 3-4    | AV         | C    |         |
| 1328 | 4      | AV         | C    |         |
| 1329 | 4      | AV         | C    |         |
| 1334 | Sefton | AV         | C    |         |
| 1336 | 5      | AV         | C    |         |
| 1337 | 1      | AV         | C    |         |
| 1338 | Sefton | AV         | C    |         |
| 1341 | Sefton | AV         | C    |         |
| 1342 | 4      | AV         | C    |         |
| 1343 | 3      | AV         | C    |         |
| 1346 | 4      | AV         | B    |         |
| 1350 | 7+     | AV         | C    |         |
| 1351 | 4      | AV         | C    |         |
| 1352 | 4      | AV         | C    |         |
| 1402 | 4      | AV         | C    |         |
| 1404 | 3      | AV         | C    |         |
| 1407 | 7+     | AV         | C    |         |
| 1408 | 3      | AV         | C    |         |
| 1414 | 4      | AV         | C    |         |

|      |     |       |      |            |
|------|-----|-------|------|------------|
| 1418 | 3   | AV    | C    |            |
| 1421 | 3   | AV    | C    |            |
| 1423 | 4   | AV    | C    |            |
| 1428 | 4   | AV    | C    |            |
| 1431 | 3   | AV    | B    | Apex       |
| 1437 | 4   | AV    | C    |            |
| TIME | FAN | EVENT | SIZE | NOTES      |
| 1440 | 3   | AV    | C    |            |
| 1441 | 3-4 | AV    | B    |            |
| 1443 | 7   | AV    | C    |            |
| 1449 | 4   | AV    | C    |            |
| 1451 | 3   | AV    | C    |            |
| 1502 | 4   | AV    | B    |            |
| 1506 | 5   | AV    | C    |            |
| 1508 | 4   | AV    | C    |            |
| 1510 | 4   | AV    | C    |            |
| 1512 | 5   | AV    | C    |            |
| 1517 | 7   | AV    | C    |            |
| 1521 | 3   | AV    | C    |            |
| 1524 | 5   | AV    | C    |            |
| 1526 | 4   | AV    | C    |            |
| 1528 | 7   | AV    | B    |            |
| 1528 | 4   | AV    | C    |            |
| 1530 | 7   | AV    | C    |            |
| 1551 | 5   | AV    | C    |            |
| 1533 | 4   | AV    | C    |            |
| 1536 | 4   | AV    | C    |            |
| 1538 | 3   | AV    | C    |            |
| 1543 | 3-4 | AV    | C    |            |
| 1550 | 3   | AV    | C    |            |
| 1558 | 5   | AV    | B    | Apex       |
| 1600 | 5   | AV    | C    |            |
| 1601 | 5   | AV    | B    | Apex       |
| 1602 | 7   | AV    | C    |            |
| 1603 | 1   | AV    | C    |            |
| 1603 | 4   | AV    | C    |            |
| 1604 | 5   | AV    | C    |            |
| 1606 | 4   | AV    | A    | Distal fan |
| 1607 | 4   | AV    | C    |            |
| 1617 | 3   | AV    | B    | Apex       |
| 1622 | 4   | AV    | C    |            |
| 1623 | 7   | AV    | C    |            |



|                                                                                      |        |    |   |  |
|--------------------------------------------------------------------------------------|--------|----|---|--|
| 1625                                                                                 | 7      | AV | C |  |
| 1626                                                                                 | 4      | AV | C |  |
| 1631                                                                                 | 5      | AV | C |  |
| 1633                                                                                 | Sefton | AV | C |  |
| 1635                                                                                 | 1      | AV | C |  |
| 1645                                                                                 | 5      | AV | C |  |
| 1653                                                                                 | 1      | AV | B |  |
| Flume cam<br>employed for<br>ablation – 10<br>min intervals<br>on Fan 4 for 3<br>hrs |        |    |   |  |

\*Sefton location indicates avalanches from Mt Sefton – not included on IDFs
