# Supplementary material for: Geomorphology of icy debris fans: Delivery of ice and sediment to valley glaciers decoupled from icecaps
Source: Oxford University Press journal article supplement (doi:10.1130/ges01622.1), 2018-06-04
Supplement: ges01622_suppitemb.zip [file ges01622_suppitemb.zip]

## McCarthy Glacier - Event Log -- July 2006

| Date  | Time      | Locality                      | Event          | Size    |                         |
|-------|-----------|-------------------------------|----------------|---------|-------------------------|
| 7-Jul | 12:00-7   | East fan                      | 4-5 Avalanches | unknown | <b>Above fan apex</b>   |
| 7-Jul | 7:30-9:00 | East fan                      | 3 Avalanches   | unknown | <b>unless noted</b>     |
| 7-Jul | 9:05      | East fan                      | Rockfall       | B       | Shot GPR LINE           |
| 7-Jul | 9:40      | East fan/Middle               | Rockfall       | B       |                         |
| 7-Jul | 10:35     | West fan                      | Rockfall       | A       |                         |
| 7-Jul | 10:40     | West wall(?)                  | Rockfall       | A       |                         |
| 7-Jul | 10:45     | West wall                     | Rockfall       | B       |                         |
| 7-Jul | 10:50     | West talus                    | Rockfall       | A       |                         |
| 7-Jul | 10:52     | West talus                    | Rockfall       | A       |                         |
| 7-Jul | 10:54     | Middle fan                    | Rockfall       | C       |                         |
| 7-Jul | 10:54     | Increased surge in waterflows |                |         |                         |
| 7-Jul | 10:55     | East fan                      | Rockfall       | A       | apex region             |
| 7-Jul | 10:58     | West wall                     | Rockfall       | B       |                         |
| 7-Jul | 11:13     | West wall                     | Rockfall       | A       |                         |
| 7-Jul | 11:15     | Middle fan                    | Rockfall       | A       |                         |
| 7-Jul | 11:19     | West wall                     | Rockfall       | B       |                         |
| 7-Jul | 11:21     | West wall                     | Rockfall       | A       |                         |
| 7-Jul | 11:35     | Middle fan                    | Rockfall       | C       |                         |
| 7-Jul | 11:36     | West wall                     | Rockfall       | B       |                         |
| 7-Jul | 11:41     | West wall                     | Rockfall       | A       |                         |
| 7-Jul | 11:45     | East fan                      | Avalanche      | A       |                         |
| 7-Jul | 11:50     | East fan/Middle               | Rockfall       | B       |                         |
| 7-Jul | 12:05     | West wall                     | Rockfall       | A       |                         |
| 7-Jul | 12:20     | Middle fan                    | Rockfall       | B       |                         |
| 7-Jul | 12:31     | East fan                      | Avalanche      | B       |                         |
| 7-Jul | 1:00      | West wall                     | Rockfall       | B       |                         |
| 7-Jul | 1:05      | East fan                      | Avalanche      | C       |                         |
| 7-Jul | 1:13      | Middle fan                    | Rockfall       | B       |                         |
| 7-Jul | 1:45      | East fan                      | Rockfall       | A       |                         |
| 7-Jul | 2:35      | East fan/Middle               | Rockfall       | B       |                         |
| 7-Jul | 2:36      | West wall                     | Rockfall       | A       |                         |
| 7-Jul | 3:00      | East fan                      | Avalanche      | A       | apex region             |
| 7-Jul | 3:10      | West fan                      | Avalanche      | B       |                         |
| 7-Jul | 3:50      | East fan                      | Avalanche      | A       |                         |
| 7-Jul | 3:57      | West wall                     | Rockfall       | A       |                         |
| 7-Jul | 4:13      | Middle fan                    | Rockfall       | A       |                         |
| 7-Jul | 5:25      | Middle fan                    | Rockfall       | A       |                         |
| 7-Jul | 5:27      | East fan                      | Avalanche      | A       | apex region             |
| 7-Jul | 5:28      | Middle fan                    | Rockfall       | A       | Noteable cooling, windy |
| 7-Jul | 5:43      | West fan                      | Avalanche      | A       |                         |
| 7-Jul | 7:15      | Middle fan                    | Rockfall       | B       |                         |
| 7-Jul | 8:02      | East fan                      | Avalanche      | A       | apex region             |
| 7-Jul | 8:10      | Middle fan                    | Rockfall       | A       |                         |
| 7-Jul | 8:15      | East fan                      | Rockfall       | A       |                         |
| 7-Jul | 8:47      | East fan                      | Avalanche      | B       |                         |
| 7-Jul | 9:02      | East fan                      | Avalanche      | B       |                         |
| 7-Jul | 9:33      | East fan                      | Avalanche      | C       | Rain/Snow begins        |
| 8-Jul | 5:45      | East fan                      | Avalanche      | B       | Cloudy, cool, 50's      |

|       |       |            |                 |   |                          |
|-------|-------|------------|-----------------|---|--------------------------|
| 8-Jul | 6:15  | East fan   | Avalanche       | A |                          |
| 8-Jul | 3:30  | East fan   | Avalanche       | A |                          |
| 8-Jul | 3:35  | East fan   | Avalanche       | A |                          |
| 8-Jul | 3:40  | East fan   | Avalanche       | B |                          |
| 8-Jul | 3:44  | Middle fan | Rockfall        | A |                          |
| 8-Jul | 3:55  | East fan   | Avalanche       | B |                          |
| 8-Jul | 4:00  | West wall  | Rockfall        | A |                          |
| 8-Jul | 4:10  | East fan   | Avalanche       | B |                          |
| 8-Jul | 4:25  | East fan   | Avalanche       | B |                          |
| 8-Jul | 4:55  | East fan   | Avalanche       | C |                          |
| 8-Jul | 5:00  | East fan   | Avalanche       | B |                          |
| 8-Jul | 5:10  | East fan   | Avalanche       | B |                          |
| 8-Jul | 5:12  | East fan   | Avalanche       | A | apex region              |
| 8-Jul | 5:13  | East fan   | Rockfall        | A |                          |
| 8-Jul | 5:20  | Middle fan | Rockfall        | A |                          |
| 8-Jul | 6:00  | East fan   | Rockfall        | A |                          |
| 8-Jul | 9:02  | East fan   | Avalanche       | A | Rain after 9pm           |
| 9-Jul | 7:13  | East fan   | Avalanche       | A | Morning - mist warm 60's |
| 9-Jul | 7:40  | East fan   | Rockfall        | A | Shot survey line         |
| 9-Jul | 8:03  | East fan   | Avalanche       | A |                          |
| 9-Jul | 8:55  | East fan   | Avalanche       | A |                          |
| 9-Jul | 9:05  | East fan   | Avalanche       | A |                          |
| 9-Jul | 9:40  | West wall  | Rockfall        | A |                          |
| 9-Jul | 9:45  | Middle fan | Avalanche       | A |                          |
| 9-Jul | 10:15 | West fan   | Avalanche       | A |                          |
| 9-Jul | 10:40 | East wall  | Rockfall        | A |                          |
| 9-Jul | 10:55 | West wall  | Rockfall        | A |                          |
| 9-Jul | 11:37 | Middle fan | Rockfall        | A |                          |
| 9-Jul | 11:41 | East fan   | Avalanche       | A | apex region              |
| 9-Jul | 11:46 | West fan   | Avalanche       | A |                          |
| 9-Jul | 12:15 | Middle fan | Avalanche       | B |                          |
| 9-Jul | 12:25 | Middle fan | Rockfall        | A |                          |
| 9-Jul | 12:46 | West wall  | Rockfall        | A |                          |
| 9-Jul | 12:44 | East fan   | Avalanche       | A |                          |
| 9-Jul | 1:06  | East fan   | Avalanche       | A |                          |
| 9-Jul | 1:20  | Middle fan | Rockfall        | A |                          |
| 9-Jul | 1:26  | West fan   | Water surge     | A |                          |
| 9-Jul | 1:28  | East fan   | Avalanche       | A |                          |
| 9-Jul | 1:59  | Middle fan | Rockfall        | A |                          |
| 9-Jul | 2:15  | East fan   | Avalanche       | A |                          |
| 9-Jul | 2:35  | West fan   | Rockfall        | A |                          |
| 9-Jul | 2:45  | West fan   | Debris flow     | C |                          |
| 9-Jul | 3:01  | Middle Fan | Rockfall        | B |                          |
| 9-Jul | 3:07  | East wall  | Rockfall        | A |                          |
| 9-Jul | 3:17  | Middle fan | Rockfall        | A |                          |
| 9-Jul | 3:22  | East fan   | Avalanche       | A |                          |
| 9-Jul | 3:30  | Middle fan | Rockfall        | A |                          |
| 9-Jul | 3:32  | West fan   | Water reduction | A |                          |
| 9-Jul | 3:32  | East wall  | Rockfall        | A |                          |
| 9-Jul | 3:43  | Middle fan | Rockfall        | A |                          |
| 9-Jul | 3:49  | East fan   | Avalanche       | B |                          |
| 9-Jul | 3:52  | East fan   | Avalanche       | A |                          |

|        |       |                 |                 |   |                             |
|--------|-------|-----------------|-----------------|---|-----------------------------|
| 9-Jul  | 3:54  | West fan        | Hyperconc. Flow | B | mid-fan region              |
| 9-Jul  | 4:35  | West fan        | Debris flow     | D | mid-fan region              |
| 9-Jul  | 4:50  | East fan        | Avalanche       | A | apex region                 |
| 9-Jul  | 4:55  | Middle fan      | Avalanche       | A |                             |
| 9-Jul  | 5:06  | East fan        | Avalanche       | A |                             |
| 9-Jul  | 5:24  | West wall       | Rockfall        | A |                             |
| 9-Jul  | 5:26  | East fan        | Avalanche       | B |                             |
| 9-Jul  | 5:31  | East fan/Middle | Rockfall        | A |                             |
| 9-Jul  | 5:32  | East wall       | Rockfall        | A |                             |
| 9-Jul  | 5:54  | East fan        | Avalanche       | A |                             |
| 9-Jul  | 6:16  | East fan        | Avalanche       | B |                             |
| 9-Jul  | 6:21  | East fan        | Rockfall        | A |                             |
| 9-Jul  | 6:35  | East fan        | Avalanche       | B |                             |
| 9-Jul  | 6:37  | East fan        | Avalanche       | A |                             |
| 9-Jul  | 6:38  | East fan        | Avalanche       | A | mid fan region              |
| 9-Jul  | 6:40  | East fan        | Avalanche       | C |                             |
| 9-Jul  | 6:42  | East fan        | Avalanche       | B |                             |
| 9-Jul  | 7:12  | West fan        | Hyperconc. Flow | B | mid-fan region              |
| 9-Jul  | 7:22  | East fan        | Avalanche       | B |                             |
| 9-Jul  | 7:40  | East wall       | Rockfall        | A |                             |
| 9-Jul  | 7:45  | East fan        | Avalanche       | B |                             |
| 9-Jul  | 8:02  | Middle fan      | Avalanche       | A |                             |
| 9-Jul  | 8:17  | Middle fan      | Rockfall        | A |                             |
| 9-Jul  | 8:41  | East wall       | Rockfall        | A |                             |
| 9-Jul  | 9:06  | East fan        | Avalanche       | A |                             |
| 9-Jul  | 10:05 | East fan        | Avalanche       | B |                             |
| 9-Jul  | 10:09 | East fan        | Avalanche       | B |                             |
| 9-Jul  | 10:25 | East fan        | Avalanche       | A | apex region                 |
| 9-Jul  | 10:33 | East fan        | Avalanche       | B |                             |
| 9-Jul  | 10:36 | East fan        | Avalanche       | A | apex region                 |
| 9-Jul  | 11:50 | East fan        | Avalanche       | C |                             |
| 10-Jul | 12:30 | East fan        | Avalanche       | C |                             |
| 10-Jul | 1:15  | West Fan        | Hyper. Flow     |   |                             |
| 10-Jul | 2:30  | East fan        | Avalanche       | B | Jokuhlaup reduced by 1:30pm |
| 10-Jul | 3:00  | East fan        | Avalanche       | A |                             |
| 10-Jul | 4:30  | East fan        | Avalanche       | A |                             |
| 10-Jul | 7:32  | East fan        | Avalanche       | A |                             |
| 10-Jul | 8:04  | East fan        | Avalanche       | A | apex region                 |
| 10-Jul | 8:07  | Middle/East fan | Avalanche       | A |                             |
| 10-Jul | 8:30  | West wall       | Rockfall        | A |                             |
| 10-Jul | 8:50  | Lower glacier   | Calving ice     |   |                             |
| 10-Jul | 9:30  | East fan        | Avalanche       | B |                             |
| 10-Jul | 9:32  | East fan        | Avalanche       | A |                             |
| 10-Jul | 9:42  | East fan        | Avalanche       | C |                             |
| 10-Jul | 9:58  | Middle fan      | Rockfall        | A |                             |
| 10-Jul | 10:10 | East fan        | Avalanche       | A |                             |
| 10-Jul | 10:11 | Middle fan      | Avalanche       | A |                             |
| 10-Jul | 10:17 | West fan        | Avalanche       | A |                             |
| 10-Jul | 10:19 | East fan        | Avalanche       | A | Full sun by 10:00           |
| 10-Jul | 10:35 | East fan        | Avalanche       | B |                             |
| 10-Jul | 10:48 | East fan        | Avalanche       | A |                             |
| 10-Jul | 10:59 | Middle          | Avalanche       | B |                             |

|        |       |            |                  |   |                                |
|--------|-------|------------|------------------|---|--------------------------------|
| 10-Jul | 11:16 | East fan   | Avalanche        | A |                                |
| 10-Jul | 11:20 | West wall  | Rockfall         | A |                                |
| 10-Jul | 11:22 | Middle Fan | Avalanche        | A |                                |
| 10-Jul | 11:26 | West fan   | Avalanche        | A |                                |
| 10-Jul | 11:29 | East wall  | Rockfall         | A |                                |
| 10-Jul | 11:30 | West wall  | Rockfall         | A |                                |
| 10-Jul | 11:35 | West fan   | Avalanche        | A |                                |
| 10-Jul | 11:37 | West fan   | Rockfall         | A |                                |
| 10-Jul | 11:43 | Middle fan | Unknown (rockfal | A |                                |
| 10-Jul | 11:48 | Middle fan | Avalanche        | A |                                |
| 10-Jul | 11:51 | East wall  | Rockfall         | A |                                |
| 10-Jul | 11:52 | East wall  | Rockfall         | A |                                |
| 10-Jul | 11:56 | East fan   | Avalanche        | A |                                |
| 10-Jul | 12:17 | West wall  | Rockfall         | A |                                |
| 10-Jul | 12:28 | Unknown    | Avalanche        | A |                                |
| 10-Jul | 12:39 | West wall  | Rockfall         | B |                                |
| 10-Jul | 12:40 | East wall  | Rockfall         | A |                                |
| 10-Jul | 12:41 | East fan   | Avalanche        | B |                                |
| 10-Jul | 12:59 | Middle fan | Avalanche        | A |                                |
| 10-Jul | 1:00  | West wall  | Rockfall         | A |                                |
| 10-Jul | 1:05  | East fan   | Avalanche        | B |                                |
| 10-Jul | 1:07  | West fan   | Avalanche        | A | Hot (70+), sunny               |
| 10-Jul | 1:25  | East wall  | Rockfall         | A |                                |
| 10-Jul | 1:36  | East fan   | Avalanche        | B |                                |
| 10-Jul | 1:46  | East fan   | Avalanche        | B |                                |
| 10-Jul | 1:48  | East fan   | Avalanche        | A |                                |
| 10-Jul | 1:49  | East fan   | Avalanche        | B |                                |
| 10-Jul | 1:52  | Glacier    | Rockfall         | B |                                |
| 10-Jul | 1:59  | East fan   | Avalanche        | A |                                |
| 10-Jul | 2:16  | Middle fan | Avalanche        | A |                                |
| 10-Jul | 2:32  | East fan   | Avalanche        | A |                                |
| 10-Jul | 2:40  | East fan   | Avalanche        | A |                                |
| 10-Jul | 2:45  | East fan   | Avalanche        | A |                                |
| 10-Jul | 2:47  | Unknown    | Rockfall         | A |                                |
| 10-Jul | 2:52  | Glacier    | Calving ice      | A |                                |
| 10-Jul | 2:54  | East fan   | Avalanche        | A |                                |
| 10-Jul | 2:59  | East fan   | Avalanche        | C |                                |
| 10-Jul | 3:49  | West fan   | Avalanche        | A |                                |
| 10-Jul | 4:21  | West fan   | Avalanche        | A |                                |
| 10-Jul | 4:27  | East fan   | Avalanche        | B |                                |
| 10-Jul | 4:58  | West wall  | Rockfall         | A |                                |
| 10-Jul | 6:15  | East fan   | Avalanche        | A |                                |
| 10-Jul | 6:35  | East fan   | Avalanche        | A |                                |
| 10-Jul | 6:37  | Unknown    | Avalanche        | A | Crevasse Enlarging apex middle |
| 10-Jul | 6:55  | East fan   | Avalanche        | A |                                |
| 10-Jul | 6:58  | East fan   | Avalanche        | A |                                |
| 10-Jul | 6:59  | East fan   | Avalanche        | B |                                |
| 10-Jul | 7:01  | East fan   | Avalanche        | A |                                |
| 10-Jul | 7:08  | East fan   | Avalanche        | A |                                |
| 10-Jul | 7:38  | Glacier    | Calving ice      | A |                                |
| 10-Jul | 7:41  | East fan   | Avalanche        | A |                                |
| 10-Jul | 8:00  | East fan   | Avalanche        | A |                                |

|        |       |                     |                   |   |                              |
|--------|-------|---------------------|-------------------|---|------------------------------|
| 10-Jul | 8:03  | East fan            | Avalanche         | B |                              |
| 10-Jul | 8:15  | East fan            | Avalanche         | A |                              |
| 10-Jul | 8:34  | Glacier             | Calving ice       | A |                              |
| 10-Jul | 8:40  | East fan            | Avalanche         | A |                              |
| 10-Jul | 8:43  | East fan            | Avalanche         | A |                              |
| 10-Jul | 8:53  | Glacier             | Calving ice       | A |                              |
| 10-Jul | 8:56  | Middle Fan/East fan | Avalanche         | A |                              |
| 10-Jul | 9:10  | East fan            | Avalanche         | A |                              |
| 10-Jul | 9:13  | East fan            | Avalanche         | A |                              |
| 10-Jul | 9:14  | East fan            | Avalanche         | A |                              |
| 10-Jul | 9:19  | Middle Fan          | Avalanche         | A |                              |
| 10-Jul | 9:26  | East fan            | Avalanche         | B |                              |
| 10-Jul | 9:27  | East fan            | Avalanche         | A |                              |
| 10-Jul | 10:30 | East fan            | Avalanche         | A | apex region                  |
| 10-Jul | 10:50 | East fan            | Avalanche         | A |                              |
| 10-Jul | 11:00 | East fan            | Avalanche         | A | apex region                  |
| 10-Jul | 11:05 | East fan            | Avalanche         | A |                              |
| <hr/>  |       |                     |                   |   |                              |
| 11-Jul | AM    | West fan            | Poss. Debris Flow | A |                              |
| 11-Jul | 4:09  | Glacier             | Calving ice       | B |                              |
| 11-Jul | 6:42  | Glacier             | Calving ice       | B | Jokulhlaup outburst west fan |
| 11-Jul | 6:45  | Glacier             | Calving ice       | B |                              |
| 11-Jul | 7:30  | Glacier             | Calving ice       | C |                              |
| 11-Jul | 7:55  | Middle fan          | Rockfall          | A |                              |
| 11-Jul | 8:20  | Middle fan          | Avalanche         | A |                              |
| 11-Jul | 8:38  | East fan            | Avalanche         | A |                              |
| 11-Jul | 9:25  | Glacier             | Calving ice       | D |                              |
| 11-Jul | 9:35  | East fan            | Avalanche         | A |                              |
| 11-Jul | 11:10 | East fan            | Avalanche         | B |                              |
| 11-Jul | 11:13 | East fan            | Avalanche         | A |                              |
| 11-Jul | 11:31 | Glacier             | Calving ice       | A |                              |
| 11-Jul | 12:06 | Glacier             | Calving ice       | A |                              |
| 11-Jul | 12:19 | Glacier             | Calving ice       | A |                              |
| 11-Jul | 12:23 | East fan            | Avalanche         | B |                              |
| 11-Jul | 12:26 | West wall           | Rockfall          | A |                              |
| 11-Jul | 12:34 | West fan            | Rockfall          | A |                              |
| 11-Jul | 12:39 | Middle/West fan     | Rockfall          | A |                              |
| 11-Jul | 12:55 | Glacier             | Calving ice       | A |                              |
| 11-Jul | 1:00  | East fan            | Avalanche         | A |                              |
| 11-Jul | 1:03  | Glacier             | Calving ice       | A |                              |
| 11-Jul | 1:05  | West fan            | Rockfall          | A |                              |
| 11-Jul | 1:15  | West fan            | Avalanche         | A |                              |
| 11-Jul | 1:18  | Middle fan          | Rockfall          | A |                              |
| 11-Jul | 1:50  | West fan            | Avalanche         | A |                              |
| 11-Jul | 2:20  | Middle fan          | Rockfall          | A |                              |
| 11-Jul | 2:33  | East fan            | Avalanche         | A |                              |
| 11-Jul | 3:00  | East fan            | Avalanche         | A |                              |
| 11-Jul | 3:02  | East fan            | Avalanche         | A |                              |
| 11-Jul | 3:32  | West wall           | Rockfall          | A |                              |
| 11-Jul | 4:01  | West wall           | Rockfall          | A |                              |
| 11-Jul | 4:05  | West wall           | Rockfall          | A |                              |
| 11-Jul | 4:15  | East fan            | Avalanche         | B |                              |
| 11-Jul | 4:34  | Middle fan          | Avalanche         | A |                              |

|        |       |                     |                  |   |                   |
|--------|-------|---------------------|------------------|---|-------------------|
| 11-Jul | 4:35  | East fan            | Avalanche        | A |                   |
| 11-Jul | 4:55  | Middle fan          | Avalanche        | D | distal fan region |
| 11-Jul | 5:30  | West fan            | Avalanche        | A |                   |
| 11-Jul | 5:51  | West fan            | Avalanche        | A |                   |
| 11-Jul | 7:03  | East fan            | Avalanche        | A | apex region       |
| 11-Jul | 9:30  | East fan            | Avalanche        | B |                   |
| 11-Jul | 9:48  | East fan            | Avalanche        | B |                   |
| 11-Jul | 9:49  | East fan            | Avalanche        | B |                   |
| 11-Jul | 11:30 | Unknown             | Water rush       |   |                   |
| 12-Jul | 12:05 | East fan            | Avalanche        | B |                   |
| 12-Jul | 12:15 | East fan            | Avalanche        | B |                   |
| 12-Jul | 12:45 | East fan            | Avalanche        | B |                   |
| 12-Jul | 1:45  | Glacier             | Jokahalop        |   |                   |
| 12-Jul | 2:00  | Glacier             | Calving ice      | B |                   |
| 12-Jul | 3:20  | Glacier             | Calving ice      | B |                   |
| 12-Jul | 4:30  | Glacier             | Calving ice      | C |                   |
| 12-Jul | 5:15  | Glacier             | Major jokulhlaup | B |                   |
| 12-Jul | 6:15  | Glacier             | Calving ice      | B |                   |
| 12-Jul | 7:15  | Glacier             | Calving ice      | A |                   |
| 12-Jul | 7:30  | Glacier             | Calving ice      | A |                   |
| 12-Jul | 8:35  | Glacier             | Calving ice      | A | Accelerated flow  |
| 12-Jul | 8:55  | East fan            | Avalanche        | A |                   |
| 12-Jul | 9:15  | East fan            | Avalanche        | A |                   |
| 12-Jul | 11:30 | East fan            | Avalanche        | B |                   |
| 12-Jul | 11:45 | End of observations |                  |   |                   |

## McCarthy Glacier – Event Log – July 2010

| Time           | Location   | Event Type | Size | Notes                 |
|----------------|------------|------------|------|-----------------------|
| <b>July 28</b> |            |            |      | Arr 13:37             |
| 15:15          | Glacier    | CALV       | B    | <b>Above fan apex</b> |
| 15:30          | Glacier    | CALV       | C-   | <b>unless noted</b>   |
| 15:35          | East Wall  | RX         | C-   |                       |
| 15:38          | Middle Fan | RX         | C    |                       |
| 15:45          | Glacier    | CALV       | C    |                       |
| 15:50          | Glacier    | CALV       | C    |                       |
| 15:51          | West Fan   | RX         | S    |                       |
| 17:10          | West Fan   | AV         | S    |                       |
| 17:15          | East Fan   | AV         | C    |                       |
| 17:30          | East Wall  | RX         | C    |                       |
| 17:31          | East Wall  | RX         | B    |                       |
| 17:36          | East Fan   | AV         | C    |                       |
| 18:14          | East Wall  | RX         | C    |                       |
| 18:15          | East Wall  | RX         | C-   |                       |
| 18:21          | Glacier    | CALV       | C    |                       |
| 18:42          | East Fan   | AV         | C    | apex region           |
| 18:50          | East Fan   | AV         | C    | Apex region           |
| 19:01          | East Fan   | AV         | C    | Apex region           |
| 19:55          | Middle Fan | AV         | C    |                       |
| 19:56          | Middle Fan | AV         | B    |                       |
| 20:04          | Glacier    | CALV       | C-   |                       |
| 20:23          | East Fan   | AV         | C    |                       |
| 20:26          | Glacier    | CALV       | C    |                       |
| 20:44          | Middle Fan | AV         | B    |                       |
| 20:56          | Middle Fan | AV         | C    |                       |
| 21:01          | East Fan   | AV         | C    |                       |
| 22:15          | Glacier    | CALV       | C-   |                       |
| <b>July 29</b> |            |            |      |                       |
| 03:15          | East Fan   | AV         | B    |                       |
| 05:07          | East Fan   | AV         | C    |                       |
| 05:41          | East Fan   | AV         | B    |                       |
| 08:21          | Glacier    | RX         | C    |                       |

| Time           | Location   | Event Type | Size | Notes       |
|----------------|------------|------------|------|-------------|
| 09:53          | Middle Fan | AV         | B    |             |
| 10:14          | East Fan   | AV         | B    |             |
| 10:29          | East Fan   | AV         | C    |             |
| 10:32          | Glacier    | RX         | C-   |             |
| 11:01          | West Fan   | RX         | C-   |             |
| 11:04          | West Fan   | RX         | C    |             |
| 11:20          | Middle Fan | AV         | C    |             |
| 11:28          | East Fan   | AV         | C    |             |
| 11:32          | Middle Fan | RX         | C    |             |
| 11:48          | East Fan   | RX         | C    |             |
| 11:56          | East Fan   | AV         | C    |             |
| 12:02          | East Fan   | AV         | C-   |             |
| 13:30          | Middle Fan | AV         | C    |             |
| 15:05          | East Fan   | AV         | C    |             |
| 16:03          | West Fan   | RX         | C    |             |
| 16:10          | Middle Fan | AV         | C    |             |
| 16:29          | Middle Fan | RX         | C    |             |
| 16:37          | East Fan   | AV         | M    | Apex region |
| 16:38          | Glacier    | CALVE      | C-   |             |
| 16:51          | East Fan   | AV         | M    | Apex region |
| 17:27          | Glacier    | CALVE      | C    |             |
| 17:36          | Glacier    | RX         | C-   |             |
| 17:40          | Middle Fan | RX         | C    |             |
| 19:26          | East Fan   | AV         | C    |             |
| 20:10          | West Slope | RX         | A    |             |
| 20:32          | West Fan   | RX         | C    |             |
| 20:38          | East Fan   | AV         | C    |             |
| 21:30          | East Fan   | AV         | B    |             |
| 23:05          | East Fan   | AV         | C    |             |
| <b>July 30</b> |            |            |      |             |
| 01:15          | Middle Fan | AV         | C    |             |
| 04:20          | East Fan   | AV         | C    |             |
| 05:45          | East Fan   | AV         | B    |             |
| 07:46          | East Fan   | AV         | C    |             |
| 08:45          | East Fan   | AV         | C    |             |



| Time  | Location   | Event Type | Size | Notes          |
|-------|------------|------------|------|----------------|
| 09:25 | Middle Fan | AV         | C    |                |
| 09:30 | East Fan   | AV         | C    |                |
| 09:43 | East Fan   | AV         | C    |                |
| 09:47 | East Fan   | AV         | B    | Apex region    |
| 10:10 | East Fan   | AV         | C    |                |
| 10:32 | Glacier    | CALV       | C    |                |
| 10:33 | Glacier    | CALV       | B    |                |
| 10:34 | East Fan   | AV         | C    |                |
| 10:45 | Middle Fan | AV         | C-   |                |
| 10:58 | East Fan   | AV         | C    |                |
| 10:59 | Middle Fan | RX         | C-   |                |
| 11:00 | Middle Fan | RX         | B    |                |
| 11:40 | Glacier    | RX         | C    |                |
| 11:42 | Glacier    | RX         | C-   |                |
| 11:46 | East Fan   | AV         | C-   |                |
| 11:48 | Middle Fan | AV         | C    |                |
| 11:55 | Glacier    | CALV       | C    |                |
| 12:05 | West Fan   | AV         | C    |                |
| 12:10 | East Fan   | AV         | C    |                |
| 12:15 | East Fan   | AV         | C    |                |
| 12:20 | East Fan   | AV         | C    |                |
| 12:35 | East Fan   | AV         | C    |                |
| 12:45 | Glacier    | RX         | C-   |                |
| 12:49 | Glacier    | CALV       | B    |                |
| 13:02 | East Fan   | AV         | C    |                |
| 13:05 | Glacier    | CALV       | C-   |                |
| 13:17 | Middle Fan | AV         | C-   |                |
| 13:23 | Middle Fan | AV         | C    |                |
| 13:24 | Middle Fan | AV         | B    | Mid-distal fan |
| 13:35 | East Fan   | AV         | C    |                |
| 13:40 | East Fan   | AV         | C    |                |
| 13:42 | East Fan   | AV         | C    |                |
| 14:09 | Middle Fan | AV         | C    |                |
| 14:28 | Middle Fan | RX         | C-   |                |
| 14:35 | East Fan   | AV         | C    |                |

| Time           | Location   | Event Type | Size | Notes     |
|----------------|------------|------------|------|-----------|
| 14:39          | East Fan   | AV         | C-   |           |
| 14:48          | East Fan   | AV         | C    |           |
| 14:49          | Glacier    | CALV       | C    |           |
| 14:50          | West Slope | RX         | C    |           |
| 14:59          | Middle Fan | AV         | C    |           |
| 15:15          | East Fan   | AV         | C-   |           |
| 15:15          | Middle Fan | AV         | C    |           |
| 15:15          | Middle Fan | RX         | C-   |           |
| 15:15          | Glacier    | RX         | C    |           |
| 16:20          | Middle Fan | RX         | B    |           |
| 17:40          | Middle Fan | RX         | C    |           |
| 18:21          | East Fan   | AV         | C    |           |
| 19:16          | East Fan   | AV         | C-   |           |
| 19:22          | East Fan   | AV         | C    |           |
| 20:01          | East Fan   | AV         | C    |           |
| 20:35          | Middle Fan | AV         | C-   |           |
| 21:30          | East Fan   | AV         | C-   |           |
| 21:45          | East Fan   | AV         | C-   |           |
| 21:50          | East Fan   | AV         | C-   |           |
| 23:15          | East Fan   | AV         | C    |           |
| 23:55          | East Fan   | AV         | C    |           |
| <b>July 31</b> |            |            |      |           |
| 01:10          | East Fan   | AV         | B    |           |
| 01:17          | East Fan   | AV         | C    |           |
| 02:05          | East Fan   | AV         | B    |           |
| 03:00          | East Fan   | AV         | C    |           |
| 03:20          | East Fan   | AV         | C    |           |
| 04:15          | East Fan   | AV         | B    | Apex area |
| 04:21          | East Fan   | AV         | B    |           |
| 05:30          | Glacier    | CALV       | B    |           |
| 05:44          | East Fan   | AV         | B    |           |
| 05:49          | Glacier    | CALV       | A    |           |
| 05:58          | East Fan   | AV         | C    |           |
| 06:31          | East Fan   | AV         | C    |           |
| 06:41          | Glacier    | CALV       | C    |           |

| Time  | Location   | Event Type | Size | Notes          |
|-------|------------|------------|------|----------------|
| 09:01 | East Fan   | AV         | C    |                |
| 09:40 | Glacier    | CALV       | C    |                |
| 10:08 | East Fan   | AV         | C    |                |
| 11:50 | East Fan   | AV         | C    |                |
| 11:53 | East Fan   | AV         | C    |                |
| 11:55 | East Fan   | AV         | C    |                |
| 12:31 | East Fan   | AV         | C    |                |
| 12:32 | East Fan   | AV         | C    |                |
| 12:40 | East Fan   | AV         | B    |                |
| 12:42 | East Fan   | AV         | C    |                |
| 13:17 | East Fan   | AV         | C    |                |
| 13:30 | East Fan   | AV         | B    | Apex area      |
| 13:47 | East Fan   | AV         | B    |                |
| 14:01 | Glacier    | CALV       | C    |                |
| 14:09 | East Fan   | AV         | B    |                |
| 14:16 | East Fan   | AV         | B    |                |
| 14:27 | East Fan   | AV         | C    |                |
| 14:45 | Glacier    | CALV       | C    |                |
| 15:20 | Glacier    | CALV       | C-   |                |
| 15:35 | West Fan   | AV         | A    | Just above apx |
| 15:50 | East Fan   | AV         | C    |                |
| 15:52 | West Slope | RX         | C    |                |
| 16:01 | West Fan   | AV         | B    |                |
| 16:13 | East Fan   | AV         | C    |                |
| 16:21 | Glacier    | CALV       | C    |                |
| 16:26 | Glacier    | CALV       | A    |                |
| 16:26 | Glacier    | CALV       | C    |                |
| 16:38 | East Fan   | AV         | C    |                |
| 16:46 | East Fan   | AV         | C    |                |
| 16:48 | East Fan   | AV         | C    |                |
| 16:50 | East Fan   | AV         | B    |                |
| 16:51 | East Fan   | AV         | C    |                |
| 16:52 | East Fan   | AV         | C    |                |
| 17:05 | East Fan   | AV         | C    |                |
| 17:40 | West Slope | RX         | A    |                |

| Time         | Location   | Event Type | Size | Notes |
|--------------|------------|------------|------|-------|
| 17:48        | East Fan   | AV         | C    |       |
| 17:49        | Glacier    | CALV       | C    |       |
| 18:37        | East Fan   | AV         | C    |       |
| 19:11        | Middle Fan | AV         | B    |       |
| 19:13        | Middle Fan | AV         | C    |       |
| 19:55        | East Fan   | AV         | B    |       |
| 20:20        | West Fan   | AV         | C    |       |
| 20:32        | East Fan   | AV         | C    |       |
| 20:40        | East Fan   | AV         | C-   |       |
| 21:01        | East Fan   | AV         | C    |       |
| 21:27        | East Fan   | AV         | C    |       |
| 21:53        | East Fan   | AV         | C    |       |
| 21:58        | East Fan   | AV         | C    |       |
| 22:51        | East Fan   | AV         | C    |       |
| 23:01        | East Fan   | AV         | C    |       |
| <b>Aug 1</b> |            |            |      |       |
| 02:20        | East Fan   | AV         | C    |       |
| 03:15        | East Fan   | AV         | B    |       |
| 03:40        | East Fan   | AV         | C    |       |
| 04:15        | East Fan   | AV         | C    |       |
| 04:55        | East Fan   | AV         | C    |       |
| 05:20        | East Fan   | AV         | C    |       |
| 05:31        | Glacier    | CALV       | C-   |       |
| 05:42        | Middle Fan | AV         | C    |       |
| 05:46        | Glacier    | RX         | C    |       |
| 05:59        | Glacier    | RX         | C    |       |
| 06:00        | East Fan   | AV         | C    |       |
| 06:24        | Middle Fan | AV         | C    |       |
| 07:50        | East Fan   | AV         | C    |       |
| 08:00        | Glacier    | RX         | C    |       |
| 09:02        | Middle Fan | RX         | C-   |       |
| 09:03        | Glacier    | RX         | C-   |       |
| 09:31        | Glacier    | CALV       | C    |       |
| 09:37        | East Fan   | AV         | C    |       |
| 09:42        | Glacier    | CALV       | C    |       |

| Time  | Location | Event Type | Size | Notes        |
|-------|----------|------------|------|--------------|
| 10:15 | East Fan | AV         | C    |              |
| 10:40 | East Fan | AV         | C    |              |
| 11:05 | East Fan | AV         | C    |              |
| 11:20 | East Fan | AV         | B    |              |
| 11:41 | East Fan | AV         | C    |              |
| 12:28 | East Fan | AV         | C    |              |
| 14:31 | East Fan | AV         | L    | Apex area    |
| 14:37 | East Fan | AV         | B    |              |
| 14:40 | Glacier  | CALV       | S    |              |
| 15:38 | West Fan | AV         | A+   | Mid-fan area |

## McCarthy Glacier – Event Log – July 2013

| Time           | Location   | Event Type | Size | Notes         |
|----------------|------------|------------|------|---------------|
| <b>July 10</b> |            |            |      | Arr 14:00     |
| 14:25          | East Fan   | AV         | C    | Above apex    |
| 14:40          | East Fan   | AV         | C    | unless noted  |
| 14:48          | East Fan E | RX         | C    |               |
| 15:20          | Glacier    | CALV       | C    |               |
| 15:41          | Glacier    | CALV       | A    |               |
| 16:04          | East Fan   | AV         | C    | Falls only    |
| 16:31          | East Fan   | AV         | C    | Flowing above |
| 16:48          | East Fan   | AV         | B    | East Fan      |
| 17:10          | East Fan   | AV         | C    |               |
| 19:15          | West Slope | RX         | C    | Flow nominal  |
| 20:10          | East Fan   | AV         | C    | From glacier  |
| 22:22          | East Fan   | AV         | C    | Along East    |
| 22:26          | East Fan   | AV         | B-   |               |
| 22:36          | East Fan E | RX         | C    |               |
| 22:44          | Glacier    | CALV       | C-   | Shower        |
| 23:11          | East Fan   | AV         | C    | Then Sunny    |
|                |            |            |      |               |
| <b>July 11</b> |            |            |      |               |
| 05:37          | Glacier    | CALV       | C    |               |
| 05:58          | East Fan   | AV         | C    |               |
| 05:59          | East Fan   | AV         | A    | Prox fan left |
| 06:40          | Glacier    | CALV       | C    |               |
| 07:18          | East Fan E | AV         | B    |               |
| 08:45          | East Fan E | AV         | C    |               |
| 09:38          | East Fan E | AV         | C    |               |
| 10:02          | East Fan   | AV         | C    |               |
| 10:13          | East Fan   | AV         | C    |               |
| 10:14          | Glacier    | CALV       | B    |               |
| 10:17          | East Fan   | AV         | C    | Sunny         |
| 10:30          | Glacier    | CALV       | C    |               |
| 10:33          | Glacier    | CALV       | C    |               |
| 11:01          | Middle Fan | AV         | C    |               |

| Time                | Location      | Event Type | Size      | Notes          |
|---------------------|---------------|------------|-----------|----------------|
| <b>July 11 ctd.</b> | 9-12-3-6 Hrbr | Cameras    | Installed | This AM        |
| 11:12               | West Fan      | RX         | C         | Flow in falls  |
| 12:03               | East Fan      | AV         | C         | Resumes to     |
| 12:11               | West Fan      | AV         | C         | West Fan       |
| 12:24               | Glacier       | CALV       | C         |                |
| 12:25               | Middle Fan    | RX         | C         |                |
| 13:45               | East Fan      | AV         | C         | Sunny          |
| 14:15               | East Fan E    | AV         | B         |                |
| 14:30               | West Fan      | AV         | C         |                |
| 16:28               | East Fan      | AV         | C         |                |
| 16:40               | East Fan      | AV         | C         |                |
| 16:58               | East Fan      | AV         | B         |                |
| 17:20               | East Fan      | AV         | C         |                |
| 18:14               | West Fan      | RX         | C         |                |
| 18:25               | East Fan      | AV         | C         |                |
| 18:27               | East Slope    | RX         | C         |                |
| 19:04               | East Fan      | AV         | C         |                |
| 19:06               | East Fan E    | AV         | C         |                |
| 19:15               | East Fan      | AV         | C         |                |
| 19:17               | West Slope    | RX         | C         |                |
| 19:28               | East Fan      | AV         | C         |                |
| 20:10               | East Fan      | AV         | C         |                |
| 20:15               | East Fan      | Av         | C         |                |
| 20:17               | West Fan      | AV         | B         | Ice frags apex |
| 20:21               | East Fan      | AV         | C-        |                |
| 20:22               | Middle Fan    | AV         | C         |                |
| 20:23               | West Fan      | RX         | C         |                |
| 20:24               | Glacier       | CALV       | C         |                |
| 20:25               | Glacier       | CALV       | B         |                |
| 20:43               | West Fan      | RX         | C         |                |
| 22:50               | Glacier       | CALV       | C         |                |
| 23:22               | East Fan      | AV         | A         | Apex central   |
|                     |               |            |           |                |
|                     |               |            |           |                |
|                     |               |            |           |                |

| Time           | Location   | Event Type | Size | Notes          |
|----------------|------------|------------|------|----------------|
| <b>July 12</b> |            |            |      |                |
| 01:17          | East Fan   | AV         | C    |                |
| 04:23          | East Fan   | AV         | C    |                |
| 05:13          | East Wall  | RX         | C    |                |
| 06:09          | East Fan   | AV         | C    |                |
| 07:55          | East Fan   | AV         | B    |                |
| 08:17          | East Fan   | AV         | C    | Sunny          |
| 08:23          | East Fan   | AV         | B    |                |
| 08:45          | Middle Fan | AV         | A    | Big in catchmt |
| 09:20          | East Fan   | AV         | C    |                |
| 09:51          | East Fan   | AV         | C    |                |
| 10:04          | Glacier    | CALV       | C    |                |
| 10:10          | East Fan   | AV         | C    |                |
| 10:25          | East Fan   | AV         | B    |                |
| 10:47          | Middle Fan | AV         | B    |                |
| 11:10          | Middle Fan | AV         | C    |                |
| 11:47          | East Fan   | AV         | C    |                |
| 11:50          | Glacier    | CALV       | C    |                |
| 12:05          | West Fan   | AV         | C    |                |
| 13:25          | West Slope | RX         | C    |                |
| 13:30          | Middle Fan | RX         | C    |                |
| 14:04          | East Fan   | AV         | C+   |                |
| 14:20          | East Fan   | AV         | B    |                |
| 14:30          | East Fan   | AV         | C    |                |
| 14:35          | East Fan   | AV         | C    |                |
| 14:43          | East Fan   | AV         | C    |                |
| 14:45          | East Fan   | AV         | C    |                |
| 14:56          | East Fan   | AV         | C    |                |
| 15:01          | Middle Fan | AV         | C    |                |
| 15:07          | West Slope | RX         | C    |                |
| 15:18          | East Fan   | AV         | C    |                |
| 15:30          | East Fan   | AV         | B    |                |
| 15:57          | Middle Fan | AV         | B    |                |
| 16:45          | East Fan   | AV         | C    |                |
| 16:56          | East Fan   | AV         | C    |                |



| Time               | Location   | Event Type | Size | Notes       |
|--------------------|------------|------------|------|-------------|
| <b>July 12 ctd</b> |            |            |      | Sunny       |
| 17:10              | East Fan   | AV         | C    |             |
| 17:25              | East Fan   | AV         | C    |             |
| 17:30              | West Slope | RX         | C    |             |
| 17:44              | East Fan   | AV         | C    |             |
| 18:13              | East Fan   | AV         | C    |             |
| 18:20              | East Fan   | AV         | C    |             |
| 18:41              | East Fan   | AV         | C    |             |
| 19:03              | East Fan   | AV         | C    |             |
| 19:15              | East Fan   | AV         | C    |             |
| 19:50              | East Fan   | AV         | C    |             |
| 19:51              | East Fan   | AV         | C    |             |
| 19:58              | East Fan   | AV         | C    |             |
| 19:59              | West Slope | RX         | C    |             |
| 20:18              | East Fan   | AV         | C    |             |
| 20:23              | Middle Fan | AV         | C    |             |
| 20:26              | East Slope | RX         | C    |             |
| 20:28              | Middle Fan | AV         | C    |             |
| 22:39              | East Fan E | AV         | B    | Apex edge E |
| 22:40              | East Fan   | AV         | C    |             |
| 23:03              | East Fan   | AV         | B    |             |
| 23:31              | East Fan   | AV         | C    |             |
|                    |            |            |      |             |
| <b>July 13</b>     |            |            |      |             |
| 01:30              | East Fan   | AV         | C    | Sunny       |
| 03:20              | East Fan   | AV         | C    |             |
| 06:23              | East Fan   | AV         | B    |             |
| 06:55              | East Fan   | AV         | B    | Apex edge W |
| 07:30              | Glacier    | CALV       | C    |             |
| 08:15              | East Fan   | AV         | C    |             |
| 08:30              | East Fan   | AV         | B    |             |
| 08:31              | West Fan   | RX         | C    |             |
| 08:40              | Middle Fan | AV         | C    |             |
| 08:41              | West Fan   | RX         | C    |             |
| 08:45              | East Fan   | AV         | C    |             |

| Time               | Location   | Event Type | Size | Notes |
|--------------------|------------|------------|------|-------|
| <b>July 13 ctd</b> |            |            |      | Sunny |
| 08:59              | Middle Fan | AV         | B    |       |
| 09:02              | East Fan   | AV         | C    |       |
| 09:25              | East Fan   | AV         | C    |       |
| 10:00              | West Fan   | RX         | C    |       |
| 10:02              | East Fan   | AV         | C    |       |
| 10:05              | East Fan   | AV         | C    |       |
| 10:10              | Middle Fan | RX         | C    |       |
| 10:15              | Middle Fan | AV         | B    |       |
| 10:17              | Middle Fan | RX         | C    |       |
| 10:40              | East Fan   | AV         | C    |       |
| 10:50              | East Fan   | AV         | C    |       |
| 11:05              | East Slope | RX         | C    |       |
| 11:10              | Glacier    | CALV       | C    |       |
| 11:16              | West Fan   | RX         | C    |       |
| 11:40              | Middle Fan | AV         | C    |       |
| 11:42              | East Fan   | AV         | C    |       |
| 12:05              | East Fan   | AV         | C    |       |
| 12:14              | Glacier    | CALV       | C    |       |
| 12:19              | Glacier    | CALV       | B    |       |
| 12:39              | East Fan   | AV         | B    |       |
| 12:43              | Middle Fan | AV         | C    |       |
| 12:46              | East Fan   | AV         | C    |       |
| 13:11              | East Fan   | AV         | C    |       |
| 13:25              | Glacier    | CALV       | C    |       |
| 13:26              | West Fan   | RX         | C    |       |
| 13:35              | Middle Fan | RX         | C    |       |
| 13:40              | Glacier    | CALV       | C    |       |
| 14:04              | Middle Fan | AV         | C    |       |
| 14:08              | East Fan   | AV         | C    |       |
| 14:10              | East Fan   | AV         | C    | sunny |
| 14:20              | Middle Fan | AV         | C    |       |
| 14:24              | Glacier    | CALV       | C    |       |
| 14:32              | East Fan   | AV         | C    |       |
| 14:35              | East Fan   | AV         | C    |       |

| Time                | Location   | Event Type | Size | Notes |
|---------------------|------------|------------|------|-------|
| <b>July 13 ctd.</b> |            |            |      | sunny |
| 14:45               | East Fan   | AV         | B    |       |
| 15:33               | Glacier    | CALV       | C    |       |
| 15:34               | East Fan   | AV         | C    |       |
| 15:37               | East Fan   | AV         | B    |       |
| 15:53               | East Fan   | AV         | C    |       |
| 16:04               | East Fan   | AV         | C    |       |
| 16:15               | East Fan   | AV         | C    |       |
| 16:17               | Middle Fan | AV         | C    |       |
| 16:47               | Glacier    | CALV       | C    |       |
| 16:56               | East Fan   | AV         | B    |       |
| 16:58               | East Fan   | AV         | C    |       |
| 17:58               | East Fan   | AV         | C    |       |
| 18:30               | East Fan   | AV         | C    |       |
| 19:10               | East Fan   | AV         | C    |       |
| 19:38               | East Fan   | AV         | B    |       |
| 20:15               | East Fan   | AV         | C    |       |
| 20:40               | East Fan   | AV         | C    |       |
| 20:55               | Glacier    | CALV       | C    |       |
| 21:30               | East Fan   | AV         | B    |       |
|                     |            |            |      |       |
| <b>July 14</b>      |            |            |      | Sunny |
| 06:07               | East Fan   | AV         | B    |       |
| 06:20               | East Fan   | AV         | C    |       |
| 06:57               | East Fan   | AV         | B    |       |
| 06:59               | Glacier    | CALV       | C    |       |
| 07:20               | East Fan   | AV         | C    |       |
| 07:35               | Glacier    | CALV       | C    |       |
| 07:49               | East Fan   | AV         | C    |       |
| 08:17               | East Fan   | AV         | C    |       |
| 08:40               | East Fan   | AV         | B    |       |
| 08:45               | Glacier    | CALV       | C    |       |
| 09:14               | East Fan   | AV         | C    |       |
| 10:20               | Glacier    | CALV       | C    |       |
| 10:42               | Glacier    | CALV       | C    |       |

| Time               | Location   | Event Type | Size | Notes |
|--------------------|------------|------------|------|-------|
| <b>July 14 ctd</b> |            |            |      | sunny |
| 10:58              | West Fan   | RX         | C    |       |
| 10:59              | Glacier    | CALV       | C    |       |
| 11:15              | West Fan   | AV         | C    |       |
| 11:40              | East Fan   | AV         | C    |       |
| 12:05              | West Fan   | AV         | C    |       |
| 12:06              | Glacier    | CALV       | C    |       |
| 12:27              | Middle Fan | AV         | C    |       |
| 12:35              | East Fan   | AV         | C    |       |
| 12:38              | East Fan   | AV         | C    |       |
| 12:42              | East Fan   | AV         | C    |       |
| 13:02              | East Fan   | AV         | B    |       |
| 13:22              | West Fan   | AV         | C    |       |
| 13:24              | Glacier    | CALV       | C    |       |
| 13:26              | West Fan   | RX         | C    | sunny |
| 13:27              | East Fan   | AV         | C    |       |
| 13:28              | Glacier    | CALV       | C    |       |
| 14:30              | East Fan   | AV         | C    |       |
| 15:15              | East Fan   | AV         | C    |       |
| 15:21              | Glacier    | CALV       | C    |       |
| 15:33              | East Fan   | AV         | C    |       |
| 16:50              | Glacier    | CALV       | C    |       |
| 17:10              | Glacier    | CALV       | C    |       |
| 17:25              | Glacier    | CALV       | C    |       |
| 17:35              | Glacier    | CALV       | C    |       |
| 18:08              | East Fan   | AV         | C    |       |
| 18:22              | Middle Fan | AV         | B    |       |
| 18:50              | Glacier    | CALV       | C    |       |
| 18:58              | East Fan   | AV         | C    |       |
| 19:17              | East Fan   | AV         | C    |       |
| 20:10              | East Fan   | AV         | C    |       |
| 20:27              | East Fan   | AV         | C    |       |
| 20:40              | East Fan   | AV         | C    |       |
| 22:15              | East Fan   | AV         | C    |       |
|                    |            |            |      |       |

[illegible]

## McCarthy Glacier – Event Log – June 2015

| Time           | Location   | Event Type | Size                        | Notes          |
|----------------|------------|------------|-----------------------------|----------------|
| <b>June 22</b> |            |            |                             | Arr 14:15      |
| 14:35          | East Fan   | AV         | C                           | Above apex     |
| 15:15          | East Fan   | AV         | C                           | unless noted   |
| 15:45          | Glacier    | CALV       | C                           |                |
| 16:18          | Glacier    | CALV       | C                           |                |
| 16:42          | West Fan   | RX         | C                           |                |
| 16:46          | West Fan   | AV         | C                           |                |
| 17:01          | East Fan   | AV         | C                           |                |
| 17:03          | East Fan   | AV         | C                           |                |
| 17:09          | East Fan   | AV         | C+                          | Slid to apex   |
| 17:10          | Glacier    | CALV       | C-                          |                |
| 17:20          | East Fan   | AV         | C+                          |                |
| 17:38          | East Fan   | AV         | C                           |                |
| 17:55          | West Fan   | RX         | C                           |                |
| 18:15          | East Fan   | AV         | C                           | Major cracking |
| 18:47          | East Fan   | AV         | C                           |                |
| 19:53          | West Fan   | RX         | C                           | Then Sunny     |
| 19:59          | West Fan   | AV         | C                           |                |
| 21:40          | East Fan   | AV         | C                           |                |
| 22:10          | Glacier    | CRACK      | 4 <sup>th</sup> major crack |                |
| <b>June 23</b> |            |            |                             |                |
| 0:240          | East Fan   | AV         | B                           | Sliding apex   |
| 04:15          | East Fan   | AV         | C                           |                |
| 04:20          | East Fan   | AV         | C                           |                |
| 05:58          | East Fan   | AV         | B                           | Sliding apex   |
| 06:15          | East Fan   | AV         | C                           |                |
| 07:05          | Middle Fan | RX         | C                           |                |
| 07:07          | East Fan   | AV         | C                           |                |
| 07:10          | West Slope | RX         | C                           |                |
| 07:28          | East Fan   | AV         | C                           |                |
| 08:13          | East Fan   | AV         | C                           |                |
| 08:15          | East Fan   | AV         | C                           |                |
| 09:10          | East Fan   | AV         | C                           |                |

| Time        | Location   | Event Type   | Size | Notes          |
|-------------|------------|--------------|------|----------------|
| 09:32       | East Fan   | AV           | B    | In apex chute  |
| 09:55       | West Fan   | AV           | B    |                |
| 10:15       | Middle Fan | AV           | B    |                |
| 10:30       | East Fan   | AV           | C    |                |
| 10:55       | East Fan   | AV           | C    |                |
| 11:14       | West Slope | RX           | C    |                |
| 11:37       | Middle Fan | AV           | B    | Dirty ice      |
| 12:15       | Middle Fan | AV           | C    |                |
| 12:18       | West Slope | RX           | C    |                |
| 12:20       | East Fan   | AV           | C    |                |
| 12:33       | East Fan   | AV           | C    |                |
| 12:48       | Middle Fan | AV           | C    | DF Surge Event |
| 12:50       | Middle Fan | RX/DF        | C    | RX & slurry    |
| 12:55       | Middle Fan | RX           | C    |                |
| 13:09       | West Slope | RX           | C    |                |
| 13:12       | West Slope | RX           | C    |                |
| 13:15       | East Fan   | AV           | C    |                |
| 13:15-14:30 | Middle Fan | RX/DF slurry | C    | Major surges   |
| 13:20       | East Fan   | AV           | C    |                |
| 13:21       | Middle Fan | RX/ICE/DF    | B    | DF             |
| 13:40       | East Fan   | AV           | C    |                |
| 13:42       | Middle Fan | RX/DF        | B    | surge          |
| 13:44       | Middle Fan | RX/ICE/DF    | B    | surge          |
| 13:45       | Middle Fan | RX/DF        | B    | Surges every   |
| 13:46       | Middle Fan | RX/ICE/DF    | A    | 15-20 min      |
| 15:25       | East Fan   | AV           | C    | Final ~17:00   |
| 15:30       | Middle Fan | AV           | C    |                |
| 15:50       | Middle Fan | AV           | B    | In chute area  |
| 15:55       | East Fan   | AV           | C    |                |
| 16:48       | East Fan   | AV           | C    |                |
| 17:50       | East Fan   | Av           | B    |                |
| 18:15       | East Fan   | AV           | A    | Apex area      |
| 18:18       | East Fan   | AV           | C    |                |
| 19:05       | East Fan   | AV           | C    |                |
| 19:09       | Glacier    | CALV         | C    |                |

| Time           | Location   | Event Type | Size  | Notes          |
|----------------|------------|------------|-------|----------------|
| 23:05          | East Fan   | AV         | C     |                |
| 23:10          | East Fan   | AV         | C     |                |
| 23:50          | East Fan   | AV         | C     |                |
| <b>June 24</b> |            |            |       |                |
| 0:19           | East Fan   | AV         | C     |                |
| 01:40          | East Fan   | AV         | B     | Slid in apex   |
| 03:15          | Glacier    | CALV       | C     |                |
| 04:20          | East Fan   | AV         | C     |                |
| 04:50          | East Fan   | AV         | C     |                |
| 06:21          | West Fan   | RX         | C     |                |
| 06:37          | Glacier    | CALV       | C     |                |
| 06:49          | West Slope | RX         | C     |                |
| 08:15          | Middle Fan | AV         | C     |                |
| 08:45          | East Fan   | AV         | C     |                |
| 09:10          | West Fan   | RX         | C     |                |
| 09:11          | Middle Fan | AV         | B     |                |
| 09:15          | Middle Fan | AV         | A +++ | Huge-to distal |
| 09:56          | East Fan   | AV         | B     | Ran over DF    |
| 10:27          | East Fan   | AV         | C     |                |
| 11:05          | East Fan   | AV         | C     |                |
| 11:47          | East Fan   | AV         | C     |                |
| 12:00          | Middle Fan | DF         | C+    | Sml surge DF   |
| 12:45          | East Fan   | AV         | C+    |                |
| 12:55          | East Fan   | AV         | C     |                |
| 13:00          | East Fan   | AV         | C     |                |
| 13:05          | East Fan   | AV         | C     |                |
| 13:14          | Middle Fan | RX         | C     |                |
| 13:19          | East Slope | RX         | C     |                |
| 13:27          | East Fan   | AV         | C-    |                |
| 13:32          | East Fan   | AV         | C+    |                |
| 14:10          | East Fan   | AV         | C     |                |
| 14:15          | Middle Fan | RX         | C     |                |
| 14:28          | Middle Fan | RX         | C     |                |
| 14:31          | East Fan   | AV         | C+    |                |
| 14:37          | West Fan   | AV         | C     |                |



|                |            |      |    |  |
|----------------|------------|------|----|--|
| 14:49          | Middle Fan | AV   | C+ |  |
| 14:53          | East Fan   | AV   | C  |  |
| 14:59          | East Fan   | AV   | C- |  |
| 15:15          | West Fan   | AV   | C  |  |
| 15:17          | East Fan   | AV   | C  |  |
| 15:50          | East Fan   | AV   | C  |  |
| 16:45          | West Fan   | AV   | C  |  |
| 17:03          | Glacier    | CALV | C  |  |
| 17:10          | Middle Fan | RX   | B  |  |
| 17:12          | Middle Fan | RX   | B  |  |
| 17:13          | Middle Fan | AV   | B  |  |
| 17:49          | Middle Fan | RX   | C  |  |
| 18:01          | Middle Fan | RX   | C  |  |
| 18:06          | West Fan   | AV   | C  |  |
| 18:35          | East Fan   | AV   | C  |  |
| 19:25          | East Fan   | AV   | C  |  |
| 19:31          | East Fan   | AV   | C  |  |
| 20:10          | East Fan   | AV   | C  |  |
| 20:14          | West Slope | RX   | C  |  |
| 20:32          | East Fan   | AV   | C  |  |
| 20:53          | East Fan   | AV   | C  |  |
| 21:41          | East Fan   | AV   | C  |  |
| 22:50          | East Fan   | AV   | B  |  |
| 22:55          | East Fan   | AV   | C  |  |
| <b>June 25</b> |            |      |    |  |
| 0:05           | East Fan   | AV   | C  |  |
| 0:14           | East Fan   | AV   | B  |  |
| 04:20          | East Fan   | AV   | C  |  |
| 05:25          | East Fan   | AV   | C  |  |
| 05:40          | Middle Fan | RX   | C  |  |
| 06:10          | East Fan   | AV   | C  |  |
| 06:25          | East Fan   | AV   | C  |  |
| 06:32          | East Fan   | AV   | C  |  |
| 06:35          | West Slope | RX   | C  |  |
| 08:15          | East Fan   | AV   | C  |  |
| 09:20          | East Fan   | AV   | B  |  |

| Time     | Location    | Event Type | Size | Notes |
|----------|-------------|------------|------|-------|
| 09:30    | West Slope  | RX         | C    |       |
| 10:15    | East Fan    | AV         | C    |       |
| Departed | At 11:00 am |            |      |       |
