# Supplementary material for: Geomorphology of icy debris fans: Delivery of ice and sediment to valley glaciers decoupled from icecaps
Source: Oxford University Press journal article supplement (doi:10.1130/ges01622.1), 2018-06-04
Supplement: ges01622_suppitemb.zip [file ges01622_suppitemb.zip]

## Event Log – La Perouse Glacier – January 2013

[illegible]

| Event Log – La Perouse Glacier, New Zealand – March 2014 |                       |            |            |                        |
|----------------------------------------------------------|-----------------------|------------|------------|------------------------|
| Time                                                     | Location              | Event Type | Event Size | Notes                  |
| <b>MARCH 9, 2014</b>                                     |                       |            |            |                        |
|                                                          |                       |            |            |                        |
| 0833                                                     | Up-Glacier            | AV         | B          |                        |
| 0848                                                     | " "                   | AV         | B          |                        |
| 0905                                                     | " "                   | AV         | B          |                        |
| 0912                                                     | " "                   | AV         | C          |                        |
| 0915                                                     | " "                   | AV         | B          |                        |
| 0924                                                     | " "                   | AV         | C          |                        |
| 0927                                                     | " "                   | AV         | B          |                        |
| 0953                                                     | " "                   | AV         | B          |                        |
| 1015                                                     | " "                   | AV         | B          |                        |
| 1027                                                     | " "                   | AV         | B          |                        |
| 1028                                                     | West Fan - Catchmt    | AV         | C          |                        |
| 1036                                                     | Up glacier            | AV         | A          |                        |
| 1121                                                     | Up glacier            | AV         | B          |                        |
| 1123                                                     | West Fan - Catchmt    | RX         | C          |                        |
| 1140                                                     | West Fan - Catchmt    | AV         | C          |                        |
| 1155                                                     | West Fan – Distal Fan | AV         | AAA        | ON FAN out to the base |
| 1205                                                     | Middle Fan - Catchmt  | AV         | C          |                        |
| 1240                                                     | West Fan – Mid Fan    | AV         | A          | ON FAN to mid fan area |
| 1315                                                     | West Fan - Catchmt    | AV         | C          |                        |
| 1331                                                     | West Fan - Catchmt    | AV         | C          |                        |
| 1343                                                     | West Fan - Catchmt    | AV         | C          |                        |
| 1350                                                     | West Fan - Apex       | AV         | B          | Apex area              |
| 1400                                                     | West Fan - Apex       | AV & SF    | C          | Apex area              |
| 1404                                                     | West Fan - Catch      | AV         | C          |                        |
| 1407                                                     | West Fan - Catchmt    | AV         | C          |                        |
| 1444                                                     | Up glacier            | AV         | A          |                        |
| 1447                                                     | Up glacier            | AV         | B          |                        |
| 1448                                                     | West Fan- - Catchmt   | SF         | C          |                        |
| 1535                                                     | Up glacier            | AV         | C          |                        |
| 1605                                                     | West Fan – Distal Fan | AV         | AAA        | ON FAN out to the base |
|                                                          |                       |            |            |                        |
| <b>March 15, 2014</b>                                    |                       |            |            |                        |
| 0835                                                     | Up glacier            | AV         | B          |                        |
| 0839                                                     | Middle Fan - Catchmt  | AV         | C          |                        |
| 0855                                                     | Up glacier            | RX         | C          |                        |
| 1004                                                     | East Fan - Catchmt    | AV         | C          |                        |
| 1057                                                     | Middle Fan - Catchmt  | AV         | C          |                        |
| 1145                                                     | Middle Fan - Catchmt  | AV         | C          |                        |

|      |     |                 |  |                  |
|------|-----|-----------------|--|------------------|
|      |     |                 |  |                  |
|      |     |                 |  |                  |
|      |     |                 |  |                  |
|      |     |                 |  |                  |
|      |     |                 |  |                  |
|      |     |                 |  |                  |
|      |     |                 |  |                  |
|      |     |                 |  |                  |
|      |     |                 |  |                  |
|      |     |                 |  |                  |
|      |     |                 |  |                  |
|      |     |                 |  |                  |
|      |     |                 |  |                  |
|      |     |                 |  |                  |
|      |     |                 |  |                  |
|      |     |                 |  |                  |
|      |     |                 |  |                  |
|      |     |                 |  |                  |
|      |     |                 |  |                  |
|      |     |                 |  |                  |
|      |     |                 |  |                  |
| 1338 | 0   | B               |  |                  |
| 1344 | 3   | AAA             |  | 3m x 100m x 150m |
| 1348 | 3   | Slush<br>flow A |  |                  |
| 1358 | 0   | C               |  |                  |
| 1405 | 1   | B               |  | Apex             |
| 1410 | 0   | C               |  |                  |
| 1413 | 0   | C               |  |                  |
| 1414 | 3   | C               |  |                  |
| 1416 | 3   | C               |  |                  |
| 1419 | 3   | C               |  |                  |
| 1427 | 1   | Slushflow<br>C  |  |                  |
| 1428 | 3-4 | Slushflow<br>C  |  |                  |
| 1429 | 3-4 | C               |  |                  |
| 1450 | 0   | C               |  |                  |
| 1458 | 1   | B+              |  |                  |
| 1501 | 3   | C               |  |                  |
| 1506 | 0   | B               |  |                  |
| 1507 | 3   | A               |  | Apex             |
| 1510 | 0   | C               |  |                  |

|      |     |    |  |                   |
|------|-----|----|--|-------------------|
| 1514 | 3   | C  |  |                   |
| 1515 | 1   | C  |  |                   |
| 1523 | 1   | C  |  |                   |
| 1531 | 1   | A  |  | Midfan flow morph |
| 1539 | 1   | C  |  |                   |
| 1543 | 1   | B  |  | Midfan            |
| 1544 | 3   | B  |  | Proximal fan      |
| 1547 | 0   | B  |  |                   |
| 1550 | 0   | B  |  |                   |
| 1552 | 0   | B  |  |                   |
| 1602 | 0   | B  |  |                   |
| 1605 | 0   | B  |  |                   |
| 1609 | 1   | C  |  |                   |
| 1619 | 3   | B+ |  |                   |
| 1624 | 0   | C  |  |                   |
| 1627 | 3   | C  |  |                   |
| 1632 | 5   | B+ |  |                   |
| 1635 | 3   | A  |  | Midfan            |
| 1636 | 5   | C  |  |                   |
| 1645 | 4A  | A  |  | Proximal fan      |
| 1646 | 3   | C  |  |                   |
| 1647 | 1   | C  |  |                   |
| 1652 | 3   | C  |  |                   |
| 1659 | 1   | C  |  |                   |
| 1703 | 3   | C  |  |                   |
| 1703 | 3-4 | C  |  |                   |
| 1703 | 3   | C  |  |                   |
| 1704 | 1   | C  |  |                   |
| 1707 | 0   | C  |  |                   |
| 1708 | 1   | C  |  |                   |
| 1713 | 4-5 | B+ |  |                   |
| 1721 | 0   | C  |  |                   |
| 1722 | 3   | B  |  |                   |
| 1727 | 3-4 | C  |  |                   |
| 1728 | 0   | C  |  |                   |
| 1730 | 0   | C  |  |                   |
| 1743 | 4   | B+ |  |                   |
| 1754 | 0   | C  |  |                   |
| 1755 | 4   | A  |  | Proximal fan      |
| 1757 | 3   | B  |  |                   |
| 1808 | 3   | B  |  |                   |
| 1811 | 0   | C  |  |                   |
| 1821 | 3-4 | B  |  |                   |

|      |   |   |  |  |
|------|---|---|--|--|
| 1828 | 0 | B |  |  |
| 1831 | 4 | C |  |  |

## La Perouse Glacier, NZ – Event Log (March 10-11, 2015)

| TIME   | FAN        | EVENT TYPE | SIZE | NOTES   |
|--------|------------|------------|------|---------|
| Mar 10 |            |            |      |         |
| 0915   | Up Glacier | AV         | C    |         |
| 0925   | Up Glacier | AV         | C    |         |
| 0935   | Up Glacier | AV         | C    |         |
| 0940   | Up Glacier | AV         | C    |         |
| 1034   | MIDDLE FAN | AV         | A    | Apex    |
| 1036   | Up Glacier | AV         | B    |         |
| 1037   | WEST FAN   | AV         | C    |         |
| 1039   | WEST FAN   | AV         | C    |         |
| 1047   | Up Glacier | AV         | C    |         |
| 1050   | Up Glacier | AV         | C    |         |
| 1115   | Up Glacier | AV         | C    |         |
| 1117   | Up Glacier | AV         | C    |         |
|        |            |            |      |         |
| Mar 11 |            |            |      |         |
| 0745   | MIDDLE FAN | AV         | C    |         |
| 0942   | WEST FAN   | AV         | C    |         |
| 1021   | WEST FAN   | AV         | C    |         |
| 1045   | MIDDLE FAN | AV         | C    |         |
| 1050   | MIDDLE FAN | AV         | C    |         |
| 1102   | WEST FAN   | AV         | C    |         |
| 1150   | WEST FAN   | AV         | C    |         |
| 1215   | MIDDLE FAN | AV         | C    |         |
| 1245   | MIDDLE FAN | AV         | A    | Mid fan |
| 1317   | EAST FAN   | RX         | C    |         |
| 1344   | EAST FAN   | AV         | C    |         |
| 1351   | MIDDLE FAN | AV         | C+   |         |
| 1402   | MIDDLE FAN | AV         | C+   |         |

Flume cam deployed on Middle Fan – 0800-1630 at 10 min intervals
